# Supplementary material for: Real-time imputation of missing predictor values in clinical practice
Source: PubMed Central journal article supplement — Eur Heart J Digit Health. 2020 Dec 19;2(1):154–64. doi: 10.1093/ehjdh/ztaa016 (PMC9707891; doi:10.1093/ehjdh/ztaa016), 2020-12-19
Supplement: ztaa016_supplementary_data.pdf [file ztaa016_supplementary_data.pdf]

### Appendix A simulation 1: imputing multiple missing predictor values scenarios using local data

| #                                       | Variables missing                                                            | Methods            | MSE of the LP<br>(% difference to M-Imp) | C-index | CITL    | Calibration slope |
|-----------------------------------------|------------------------------------------------------------------------------|--------------------|------------------------------------------|---------|---------|-------------------|
| <i>Apparent performance (reference)</i> |                                                                              |                    |                                          | 0.7051  | -0.0001 | 0.9999            |
| 1                                       | (1) SBP, (2) smoking                                                         | M-Imp              | 0.0702                                   | 0.6908  | 0.0228  | 0.9415            |
|                                         |                                                                              | JMI                | 0.0685 (-2.35%)                          | 0.6913  | 0.0242  | 0.9552            |
|                                         |                                                                              | JMI <sup>aux</sup> | 0.0649 (-7.50%)                          | 0.6975  | 0.0221  | 0.9928            |
| 2                                       | (1) TC, (2) HDL-c                                                            | M-Imp              | 0.0265                                   | 0.7005  | 0.0230  | 0.9766            |
|                                         |                                                                              | JMI                | 0.0241(-8.97%)                           | 0.7013  | 0.0192  | 0.9751            |
|                                         |                                                                              | JMI <sup>aux</sup> | 0.0220 (-16.84%)                         | 0.7046  | 0.0153  | 0.9901            |
| 3                                       | (1) TC, (2) HDL-c, (3) SBP                                                   | M-Imp              | 0.0333                                   | 0.6994  | 0.0406  | 1.0003            |
|                                         |                                                                              | JMI                | 0.0314 (-5.74%)                          | 0.7000  | 0.0268  | 0.9787            |
|                                         |                                                                              | JMI <sup>aux</sup> | 0.0276 (-17.26%)                         | 0.7040  | 0.0212  | 0.9935            |
| 4                                       | (1) TC, (2) HDL-c, (3) SBP, (4) AD                                           | M-Imp              | 0.0459                                   | 0.6981  | 0.0546  | 1.0217            |
|                                         |                                                                              | JMI                | 0.0425 (-7.41%)                          | 0.6983  | 0.0255  | 0.9702            |
|                                         |                                                                              | JMI <sup>aux</sup> | 0.0394 (-14.13%)                         | 0.7044  | 0.0231  | 1.0010            |
| 5                                       | (1) TC, (2) HDL-c, (3) AD (4) smoking, (5) DM                                | M-Imp              | 0.1300                                   | 0.6797  | 0.0581  | 0.9199            |
|                                         |                                                                              | JMI                | 0.1262 (-2.98%)                          | 0.6803  | 0.0549  | 0.9211            |
|                                         |                                                                              | JMI <sup>aux</sup> | 0.1014 (-21.98%)                         | 0.6960  | 0.0369  | 1.0052            |
| 6                                       | (1) TC, (2) HDL-c, (3) AD, (4) smoking, (5) DM, (6) SBP                      | M-Imp              | 0.1383                                   | 0.6785  | 0.0758  | 0.9430            |
|                                         |                                                                              | JMI                | 0.1351 (-2.31%)                          | 0.6788  | 0.0637  | 0.9249            |
|                                         |                                                                              | JMI <sup>aux</sup> | 0.1087 (-21.45%)                         | 0.6955  | 0.0441  | 1.0128            |
| 7                                       | (1) Age, (2) gender, (3) TC, (4) HDL-c, (5) AD, (6) smoking, (7) DM, (8) SBP | M-Imp              | 0.9137                                   | 0.5112  | 0.2897  | 77.819            |
|                                         |                                                                              | JMI                | 0.9137 (0.00%)                           | 0.5112  | 0.2897  | 77.819            |
|                                         |                                                                              | JMI <sup>aux</sup> | 0.5990 (-34.44%)                         | 0.6892  | 0.1544  | 1.3754            |
| 8                                       | (1) Age, (2) gender                                                          | M-Imp              | 0.7438                                   | 0.6063  | 0.1958  | 0.8225            |
|                                         |                                                                              | JMI                | 0.6373 (-14.32%)                         | 0.6223  | 0.1616  | 0.8052            |
|                                         |                                                                              | JMI <sup>aux</sup> | 0.4517 (-39.26%)                         | 0.6931  | 0.0794  | 1.0828            |

Legend – MSE: mean squared error, LP: linear predictor, CITL: calibration in the large, M-Imp: mean imputation, JMI: joint modelling imputation, JMI<sup>aux</sup>: joint modelling imputation with auxiliary variables, SBP: systolic blood pressure, TC: total cholesterol, HDL-c: HDL-cholesterol, AD: antihypertensive drug, DM: diabetes mellitus.

## Appendix B simulation 2: imputing multiple missing predictor values scenarios using external data

| #                                       | Variables missing                                                            | Methods            | MSE of the LP<br>(% difference to M-Imp) | C-index | CITL    | Calibration slope |
|-----------------------------------------|------------------------------------------------------------------------------|--------------------|------------------------------------------|---------|---------|-------------------|
| <i>Apparent performance (reference)</i> |                                                                              |                    |                                          | 0.7051  | -0.0001 | 0.9999            |
| 1                                       | (1) SBP, (2) smoking                                                         | M-Imp              | 0.0802                                   | 0.6908  | 0.1227  | 0.9415            |
|                                         |                                                                              | JMI                | 0.0782 (-2.56%)                          | 0.6911  | 0.1018  | 0.9269            |
|                                         |                                                                              | JMI <sup>aux</sup> | 0.0801 (0.001%)                          | 0.6902  | 0.1123  | 0.9251            |
| 2                                       | (1) TC, (2) HDL-c                                                            | M-Imp              | 0.0280                                   | 0.7005  | 0.0618  | 0.9766            |
|                                         |                                                                              | JMI                | 0.0251 (-10.13%)                         | 0.7010  | 0.0244  | 0.9639            |
|                                         |                                                                              | JMI <sup>aux</sup> | 0.0248 (-11.35%)                         | 0.7017  | 0.0155  | 0.9724            |
| 3                                       | (1) TC, (2) HDL-c, (3) SBP                                                   | M-Imp              | 0.0343                                   | 0.6994  | 0.0715  | 1.0003            |
|                                         |                                                                              | JMI                | 0.0325 (-5.14%)                          | 0.6995  | 0.0308  | 0.9629            |
|                                         |                                                                              | JMI <sup>aux</sup> | 0.0324 (-5.29%)                          | 0.7003  | 0.0192  | 0.9703            |
| 4                                       | (1) TC, (2) HDL-c, (3) SBP, (4) AD                                           | M-Imp              | 0.0654                                   | 0.6982  | 0.1943  | 1.0217            |
|                                         |                                                                              | JMI                | 0.0615 (-5.95%)                          | 0.6978  | 0.1661  | 0.9756            |
|                                         |                                                                              | JMI <sup>aux</sup> | 0.0583 (-10.91%)                         | 0.6998  | 0.1530  | 0.9881            |
| 5                                       | (1) TC, (2) HDL-c, (3) AD (4) smoking, (5) DM                                | M-Imp              | 0.1930                                   | 0.6797  | 0.3090  | 0.9199            |
|                                         |                                                                              | JMI                | 0.1806 (-6.42%)                          | 0.6803  | 0.2797  | 0.9067            |
|                                         |                                                                              | JMI <sup>aux</sup> | 0.1591 (-17.57%)                         | 0.6844  | 0.2595  | 0.9475            |
| 6                                       | (1) TC, (2) HDL-c, (3) AD, (4) smoking, (5) DM, (6) SBP                      | M-Imp              | 0.1974                                   | 0.6785  | 0.3189  | 0.9431            |
|                                         |                                                                              | JMI                | 0.1914 (-3.01%)                          | 0.6788  | 0.2889  | 0.9045            |
|                                         |                                                                              | JMI <sup>aux</sup> | 0.1664 (-15.70%)                         | 0.6831  | 0.2663  | 0.9483            |
| 7                                       | (1) Age, (2) gender, (3) TC, (4) HDL-c, (5) AD, (6) smoking, (7) DM, (8) SBP | M-Imp              | 0.9167                                   | 0.5157  | 0.2332  | 86.984            |
|                                         |                                                                              | JMI                | 0.9167 (0.00%)                           | 0.5157  | 0.2332  | 86.984            |
|                                         |                                                                              | JMI <sup>aux</sup> | 0.7269 (-20.70%)                         | 0.6589  | -0.0783 | 0.9687            |
| 8                                       | (1) Age, (2) gender                                                          | M-Imp              | 0.8334                                   | 0.6064  | -0.1037 | 0.8230            |
|                                         |                                                                              | JMI                | 0.7963 (-4.45%)                          | 0.6116  | -0.2221 | 0.5769            |
|                                         |                                                                              | JMI <sup>aux</sup> | 0.7018 (-15.79%)                         | 0.6721  | -0.3649 | 0.8453            |

Legend – MSE: mean squared error, LP: linear predictor, CITL: calibration in the large, M-Imp: mean imputation, JMI: joint modelling imputation, JMI<sup>aux</sup>: joint modelling imputation with auxiliary variables, SBP: systolic blood pressure, TC: total cholesterol, HDL-c: HDL-cholesterol, AD: antihypertensive drug, DM: diabetes mellitus.

### Appendix C imputing multiple missing predictor values scenarios using enriched external data; simulation 3: scenario 1

| #                           | Variables missing                                   | Methods | MSE of the LP<br>(% difference to M-Imp) | C-index | CITL    | Calibration slope |
|-----------------------------|-----------------------------------------------------|---------|------------------------------------------|---------|---------|-------------------|
| <i>Apparent performance</i> |                                                     |         |                                          | 0.7051  | -0.0001 | 0.9999            |
| 1                           | MD scenario 1* (i.e. without local data, reference) | M-Imp   | 0.0802                                   | 0.6908  | 0.1227  | 0.9415            |
|                             |                                                     | JMI     | 0.0782 (-2.56%)                          | 0.6911  | 0.1018  | 0.9269            |
|                             |                                                     | JMI+    | 0.0801 (0.001%)                          | 0.6902  | 0.1123  | 0.9251            |
| 2                           | +100 local patients                                 | M-Imp   | 0.0794                                   | 0.6908  | 0.1169  | 0.9402            |
|                             |                                                     | JMI     | 0.0769 (-3.25%)                          | 0.6912  | 0.0915  | 0.9252            |
|                             |                                                     | JMI+    | 0.0780 (-1.79%)                          | 0.6904  | 0.0987  | 0.9246            |
| 3                           | +300 local patients                                 | M-Imp   | 0.0792                                   | 0.6902  | 0.1190  | 0.9393            |
|                             |                                                     | JMI     | 0.0763 (-3.80%)                          | 0.6904  | 0.0910  | 0.9242            |
|                             |                                                     | JMI+    | 0.0771 (-2.72%)                          | 0.6897  | 0.0966  | 0.9229            |
| 4                           | +750 local patients                                 | M-Imp   | 0.0765                                   | 0.6902  | 0.1091  | 0.9396            |
|                             |                                                     | JMI     | 0.0733 (-4.37%)                          | 0.6904  | 0.0710  | 0.9233            |
|                             |                                                     | JMI+    | 0.0725 (-5.52%)                          | 0.6902  | 0.0693  | 0.9268            |
| 5                           | +1500 local patients                                | M-Imp   | 0.0746                                   | 0.6909  | 0.0845  | 0.9393            |
|                             |                                                     | JMI     | 0.0718 (-3.90%)                          | 0.6913  | 0.0510  | 0.9278            |
|                             |                                                     | JMI+    | 0.0708 (-5.37%)                          | 0.6911  | 0.0485  | 0.9315            |
| 6                           | +5000 local patients                                | M-Imp   | 0.0713                                   | 0.6869  | 0.0779  | 0.9420            |
|                             |                                                     | JMI     | 0.0699 (-2.00%)                          | 0.6874  | 0.0545  | 0.9389            |
|                             |                                                     | JMI+    | 0.0683 (-4.39%)                          | 0.6875  | 0.0482  | 0.9464            |
| 7                           | +10000 local patients                               | M-Imp   | 0.0704                                   | 0.6732  | 0.0863  | 0.8778            |
|                             |                                                     | JMI     | 0.0686 (-2.65%)                          | 0.6733  | 0.0743  | 0.8797            |
|                             |                                                     | JMI+    | 0.0671 (-4.92%)                          | 0.6739  | 0.0681  | 0.8887            |

Legend – MSE: mean squared error, LP: linear predictor, CITL: calibration in the large, M-Imp: mean imputation, JMI: joint modelling imputation, JMIaux: joint modelling imputation with auxiliary variables, \*(1) systolic blood pressure, (2) smoking.

### Appendix C (cont.) simulation 3: scenario 5

| #                           | Variables missing                                   | Methods | MSE of the LP<br>(% difference to M-Imp) | C-index | CITL    | Calibration slope |
|-----------------------------|-----------------------------------------------------|---------|------------------------------------------|---------|---------|-------------------|
| <i>Apparent performance</i> |                                                     |         |                                          | 0.7051  | -0.0001 | 0.9999            |
| 1                           | MD scenario 5* (i.e. without local data, reference) | M-Imp   | 0.1974                                   | 0.6785  | 0.3189  | 0.9431            |
|                             |                                                     | JMI     | 0.1914 (-3.01%)                          | 0.6788  | 0.2889  | 0.9045            |
|                             |                                                     | JMI+    | 0.1664 (-15.70%)                         | 0.6831  | 0.2663  | 0.9483            |
| 2                           | +100 local patients                                 | M-Imp   | 0.1929                                   | 0.6785  | 0.3081  | 0.9418            |
|                             |                                                     | JMI     | 0.1865 (-3.33%)                          | 0.6788  | 0.2775  | 0.9046            |
|                             |                                                     | JMI+    | 0.1605 (-16.81%)                         | 0.6836  | 0.2509  | 0.9502            |
| 3                           | +300 local patients                                 | M-Imp   | 0.1899                                   | 0.6785  | 0.3054  | 0.9464            |
|                             |                                                     | JMI     | 0.1827 (-3.78%)                          | 0.6788  | 0.2749  | 0.9114            |
|                             |                                                     | JMI+    | 0.1557 (-18.01%)                         | 0.6834  | 0.2445  | 0.9557            |
| 4                           | +750 local patients                                 | M-Imp   | 0.1794                                   | 0.6787  | 0.2851  | 0.9506            |
|                             |                                                     | JMI     | 0.1714 (-4.42%)                          | 0.6790  | 0.2521  | 0.9167            |
|                             |                                                     | JMI+    | 0.1425 (-20.56%)                         | 0.6844  | 0.2105  | 0.9607            |
| 5                           | +1500 local patients                                | M-Imp   | 0.1683                                   | 0.6790  | 0.2418  | 0.9387            |
|                             |                                                     | JMI     | 0.1603 (-4.78%)                          | 0.6792  | 0.2078  | 0.9095            |
|                             |                                                     | JMI+    | 0.1334 (-20.72%)                         | 0.6851  | 0.1677  | 0.9573            |
| 6                           | +5000 local patients                                | M-Imp   | 0.1472                                   | 0.6736  | 0.1960  | 0.9377            |
|                             |                                                     | JMI     | 0.1424 (-3.31%)                          | 0.6737  | 0.1696  | 0.9166            |
|                             |                                                     | JMI+    | 0.1206 (-18.11%)                         | 0.6789  | 0.1292  | 0.9585            |
| 7                           | +10000 local patients                               | M-Imp   | 0.1454                                   | 0.6630  | 0.1832  | 0.8820            |
|                             |                                                     | JMI     | 0.1410 (-3.06%)                          | 0.6629  | 0.1603  | 0.8668            |
|                             |                                                     | JMI+    | 0.1199 (-17.54%)                         | 0.6703  | 0.1291  | 0.9201            |

Legend – MSE: mean squared error, LP: linear predictor, CITL: calibration in the large, M-Imp: mean imputation, JMI: joint modelling imputation, JMI<sup>aux</sup>: joint modelling imputation with auxiliary variables, \*(1) systolic blood pressure, (2) total cholesterol, (3) HDL-cholesterol, (4) smoking, (5) antihypertensive drugs, (6) Diabetes mellitus.

### Appendix C (cont.) simulation 3: scenario 8

| #                           | Variables missing                                   | Methods | MSE of the LP<br>(% difference to M-Imp) | C-index | CITL    | Calibration slope |
|-----------------------------|-----------------------------------------------------|---------|------------------------------------------|---------|---------|-------------------|
| <i>Apparent performance</i> |                                                     |         |                                          | 0.7051  | -0.0001 | 0.9999            |
| 1                           | MD scenario 8* (i.e. without local data, reference) | M-Imp   | 0.8334                                   | 0.6064  | -0.1037 | 0.8230            |
|                             |                                                     | JMI     | 0.7963 (-4.45%)                          | 0.6116  | -0.2221 | 0.5769            |
|                             |                                                     | JMI+    | 0.7018 (-15.79%)                         | 0.6721  | -0.3649 | 0.8453            |
| 2                           | +100 local patients                                 | M-Imp   | 0.8281                                   | 0.6064  | -0.0965 | 0.8178            |
|                             |                                                     | JMI     | 0.7787 (-6.34%)                          | 0.6122  | -0.1910 | 0.5893            |
|                             |                                                     | JMI+    | 0.6764 (-22.43%)                         | 0.6733  | -0.3225 | 0.8608            |
| 3                           | +300 local patients                                 | M-Imp   | 0.8173                                   | 0.6044  | -0.0803 | 0.8118            |
|                             |                                                     | JMI     | 0.7677 (-6.46%)                          | 0.6103  | -0.1662 | 0.5841            |
|                             |                                                     | JMI+    | 0.6510 (-25.55%)                         | 0.6734  | -0.2786 | 0.8665            |
| 4                           | +750 local patients                                 | M-Imp   | 0.8089                                   | 0.6050  | -0.0540 | 0.8005            |
|                             |                                                     | JMI     | 0.7455 (-8.50%)                          | 0.6108  | -0.1166 | 0.6132            |
|                             |                                                     | JMI+    | 0.6117 (-32.24%)                         | 0.6778  | -0.2138 | 0.9232            |
| 5                           | +1500 local patients                                | M-Imp   | 0.7923                                   | 0.6107  | -0.0205 | 0.8429            |
|                             |                                                     | JMI     | 0.7253 (-9.24%)                          | 0.6131  | -0.0659 | 0.6480            |
|                             |                                                     | JMI+    | 0.5740 (-38.03%)                         | 0.6856  | -0.1451 | 0.9654            |
| 6                           | +5000 local patients                                | M-Imp   | 0.7461                                   | 0.6144  | 0.0905  | 0.9096            |
|                             |                                                     | JMI     | 0.6695 (-11.44%)                         | 0.6202  | 0.0387  | 0.7332            |
|                             |                                                     | JMI+    | 0.5094 (-46.47%)                         | 0.6914  | -0.0503 | 1.0142            |
| 7                           | +10000 local patients                               | M-Imp   | 0.7560                                   | 0.6024  | 0.1577  | 0.7556            |
|                             |                                                     | JMI     | 0.6734 (-12.27%)                         | 0.6065  | 0.1049  | 0.6707            |
|                             |                                                     | JMI+    | 0.4999 (-51.23%)                         | 0.6973  | 0.0328  | 1.0664            |

Legend – MSE: mean squared error, LP: linear predictor, CITL: calibration in the large, M-Imp: mean imputation, JMI: joint modelling imputation, JMI<sup>aux</sup>: joint modelling imputation with auxiliary variables, \*(1) age, (2) gender.



## Appendix E – R code

The completed UCC-CVRM data is available from *knn1*. The completed UCC-SMART data is available from *smart*. These data frames were used in the various simulation studies as follows:

```
load("knn1.RData")
load("smart.RData")
source("functions.r")

# test imputation model
frh_vars <-
c("leeftijd","geslacht","labchol","labhdl","bdsys","mht_all","roken","vz_
DM")
testMSE(ds[,frh_vars],missing_var="labchol",n.imp=1,method="internal",see
d=1221)

apparent_performance(data=data_imp) # c = 0.7061156, intercept = -
0.0000517122, slope = 0.9999569, eo = 1.000052

# optimism corrected performance
# age_gender_perf <- oc_performance(data=smart)
oc_performance(data=smart)

apparent_performance(data=smart)
oc_performance(data=smart)

#####
# 1. Simulation study without ldl cholesterol #
#####

smart.chol <- smart
smart.chol[,"ldlchol"] <- NULL

ucc.chol <- ucc
ucc.chol[,"ldlchol"] <- NULL

scenarios <- list(scen1 = c("labchol"),
                 scen2 = c("labhdl"),
                 scen3 = c("labchol","labhdl"),
                 scen4 = c("labchol","labhdl","roken","mht_all","vz_DM"),
                 scen5 = c("labchol","labhdl","bdsys","mht_all","roken","vz_DM"),
                 scen6 = c("labchol","labhdl","bdsys"),
                 scen7 = c("labchol","labhdl","bdsys","mht_all"),
                 scen8 =
c("leeftijd","geslacht","labchol","labhdl","bdsys","mht_all","roken","vz_
DM"))

sim_1_smart <- run_simulation(ref_data = smart.chol,
                             scenarios = scenarios,
                             validation = "jackknife",
                             seed = 12345)

sim_1_ucc <- run_simulation(ref_data = smart.chol,
                             ext_data = ucc.chol,
                             scenarios = scenarios,
                             validation = "external",
                             seed = 12345)
```





```

#####
# 2. Simulation study with remaining scenarios #
#####

scenarios <- list(scen1 = c("bdsys"),
                 scen2 = c("mht_all"),
                 scen3 = c("roken"),
                 scen4 = c("vz_DM"),
                 scen5 = c("roken", "mht_all"),
                 scen6 = c("bdsys", "mht_all", "roken"),
                 scen7 = c("leeftijd", "geslacht"))

sim_2_smart <- run_simulation(ref_data = smart,
                             scenarios = scenarios,
                             validation = "jackknife",
                             seed = 12345)
sim_2_ucc <- run_simulation(ref_data = smart,
                            ext_data = ucc,
                            scenarios = scenarios,
                            validation = "external",
                            seed = 12345)

#####
# Results simulation study #
#####

eval_jk(results=sim_2_smart,imputation_method=1,pattern=1)
eval_jk(results=sim_2_smart,imputation_method=2,pattern=1)
eval_jk(results=sim_2_smart,imputation_method=3,pattern=1)
eval_jk(results=sim_2_ucc,imputation_method=1,pattern=1)
eval_jk(results=sim_2_ucc,imputation_method=2,pattern=1)
eval_jk(results=sim_2_ucc,imputation_method=3,pattern=1)

eval_jk(results=sim_2_smart,imputation_method=1,pattern=2)
eval_jk(results=sim_2_smart,imputation_method=2,pattern=2)
eval_jk(results=sim_2_smart,imputation_method=3,pattern=2)
eval_jk(results=sim_2_ucc,imputation_method=1,pattern=2)
eval_jk(results=sim_2_ucc,imputation_method=2,pattern=2)
eval_jk(results=sim_2_ucc,imputation_method=3,pattern=2)

eval_jk(results=sim_2_smart,imputation_method=1,pattern=3)
eval_jk(results=sim_2_smart,imputation_method=2,pattern=3)
eval_jk(results=sim_2_smart,imputation_method=3,pattern=3)
eval_jk(results=sim_2_ucc,imputation_method=1,pattern=3)
eval_jk(results=sim_2_ucc,imputation_method=2,pattern=3)
eval_jk(results=sim_2_ucc,imputation_method=3,pattern=3)

eval_jk(results=sim_2_smart,imputation_method=1,pattern=4)
eval_jk(results=sim_2_smart,imputation_method=2,pattern=4)
eval_jk(results=sim_2_smart,imputation_method=3,pattern=4)
eval_jk(results=sim_2_ucc,imputation_method=1,pattern=4)
eval_jk(results=sim_2_ucc,imputation_method=2,pattern=4)
eval_jk(results=sim_2_ucc,imputation_method=3,pattern=4)

eval_jk(results=sim_2_smart,imputation_method=1,pattern=5)
eval_jk(results=sim_2_smart,imputation_method=2,pattern=5)
eval_jk(results=sim_2_smart,imputation_method=3,pattern=5)
eval_jk(results=sim_2_ucc,imputation_method=1,pattern=5)

```

```

eval_jk(results=sim_2_ucc,imputation_method=2,pattern=5)
eval_jk(results=sim_2_ucc,imputation_method=3,pattern=5)

eval_jk(results=sim_2_smart,imputation_method=1,pattern=6)
eval_jk(results=sim_2_smart,imputation_method=2,pattern=6)
eval_jk(results=sim_2_smart,imputation_method=3,pattern=6)
eval_jk(results=sim_2_ucc,imputation_method=1,pattern=6)
eval_jk(results=sim_2_ucc,imputation_method=2,pattern=6)
eval_jk(results=sim_2_ucc,imputation_method=3,pattern=6)

eval_jk(results=sim_2_smart,imputation_method=1,pattern=7)
eval_jk(results=sim_2_smart,imputation_method=2,pattern=7)
eval_jk(results=sim_2_smart,imputation_method=3,pattern=7)
eval_jk(results=sim_2_ucc,imputation_method=1,pattern=7)
eval_jk(results=sim_2_ucc,imputation_method=2,pattern=7)
eval_jk(results=sim_2_ucc,imputation_method=3,pattern=7)

#####
# 3. simulation study with enriched UCC data #
#####

# when chol is part of the scenario:
smart.chol <- smart
ucc.chol <- ucc
smart.chol[,"ldlchol"] <- NULL
ucc.chol[,"ldlchol"] <- NULL

# separate common variables in smart & ucc
smart_comvar <- smart.chol[,which(names(smart.chol) %in%
names(ucc.chol))]
ucc_comvar <- ucc.chol[,which(names(ucc.chol) %in% names(smart.chol))]

# set aside different lengths 'local' data from smart
set.seed(12345)
add1 <- smart_comvar[sample(nrow(smart_comvar),100),]
add2 <- smart_comvar[sample(nrow(smart_comvar),300),]
add3 <- smart_comvar[sample(nrow(smart_comvar),750),]
add4 <- smart_comvar[sample(nrow(smart_comvar),1500),]
add5 <- smart_comvar[sample(nrow(smart_comvar),5000),]
add6 <- smart_comvar[sample(nrow(smart_comvar),10000),]

# enrich ucc data with different lengths 'local' data from smart
ucc1 <- rbind(ucc_comvar,add1)
ucc2 <- rbind(ucc_comvar,add2)
ucc3 <- rbind(ucc_comvar,add3)
ucc4 <- rbind(ucc_comvar,add4)
ucc5 <- rbind(ucc_comvar,add5)
ucc6 <- rbind(ucc_comvar,add6)

# remove data used for enrichment from smart
smart1 <- smart_comvar[-as.numeric(rownames(add1)),]
smart2 <- smart_comvar[-as.numeric(rownames(add2)),]
smart3 <- smart_comvar[-as.numeric(rownames(add3)),]
smart4 <- smart_comvar[-as.numeric(rownames(add4)),]
smart5 <- smart_comvar[-as.numeric(rownames(add5)),]
smart6 <- smart_comvar[-as.numeric(rownames(add6)),]

# add back time/status variables
smart1$time <- smart[as.numeric(rownames(smart1)),"time"]
smart1$status <- smart[as.numeric(rownames(smart1)),"status"]

```

```

smart2$time <- smart[as.numeric(rownames(smart2)), "time"]
smart2$status <- smart[as.numeric(rownames(smart2)), "status"]
smart3$time <- smart[as.numeric(rownames(smart3)), "time"]
smart3$status <- smart[as.numeric(rownames(smart3)), "status"]
smart4$time <- smart[as.numeric(rownames(smart4)), "time"]
smart4$status <- smart[as.numeric(rownames(smart4)), "status"]
smart5$time <- smart[as.numeric(rownames(smart5)), "time"]
smart5$status <- smart[as.numeric(rownames(smart5)), "status"]
smart6$time <- smart[as.numeric(rownames(smart6)), "time"]
smart6$status <- smart[as.numeric(rownames(smart6)), "status"]

rm(add1, add2, add3, add4, add5, add6, smart_comvar, ucc_comvar, smart.chol, ucc.c
hol)

# scenarios with chol
scenarios <- list(scen1 =
c("bdsys", "labchol", "labhdl", "roken", "mht_all", "vz_DM"))

# scenarios without chol
scenarios <- list(scen1 = c("bdsys", "roken"))

sim_3_enri1 <- run_simulation(ref_data = smart1,
                             ext_data = uccl,
                             model_data = smart,
                             scenarios = scenarios,
                             validation = "enrich",
                             seed = 12345)
sim_3_enri2 <- run_simulation(ref_data = smart2,
                             ext_data = ucc2,
                             model_data = smart,
                             scenarios = scenarios,
                             validation = "enrich",
                             seed = 12345)
sim_3_enri3 <- run_simulation(ref_data = smart3,
                             ext_data = ucc3,
                             model_data = smart,
                             scenarios = scenarios,
                             validation = "enrich",
                             seed = 12345)
sim_3_enri4 <- run_simulation(ref_data = smart4,
                             ext_data = ucc4,
                             model_data = smart,
                             scenarios = scenarios,
                             validation = "enrich",
                             seed = 12345)
sim_3_enri5 <- run_simulation(ref_data = smart5,
                             ext_data = ucc5,
                             model_data = smart,
                             scenarios = scenarios,
                             validation = "enrich",
                             seed = 12345)
sim_3_enri6 <- run_simulation(ref_data = smart6,
                             ext_data = ucc6,
                             model_data = smart,
                             scenarios = scenarios,
                             validation = "enrich",
                             seed = 12345)
save(sim_3_enri4, file="simulation_3_age_gender.RData")

#####

```

```

# Results simulation study #
#####

eval_jk(results=sim_3_enri1,imputation_method=1,pattern=1)
eval_jk(results=sim_3_enri1,imputation_method=2,pattern=1)
eval_jk(results=sim_3_enri1,imputation_method=3,pattern=1)

eval_jk(results=sim_3_enri2,imputation_method=1,pattern=1)
eval_jk(results=sim_3_enri2,imputation_method=2,pattern=1)
eval_jk(results=sim_3_enri2,imputation_method=3,pattern=1)

eval_jk(results=sim_3_enri3,imputation_method=1,pattern=1)
eval_jk(results=sim_3_enri3,imputation_method=2,pattern=1)
eval_jk(results=sim_3_enri3,imputation_method=3,pattern=1)

eval_jk(results=sim_3_enri4,imputation_method=1,pattern=1)
eval_jk(results=sim_3_enri4,imputation_method=2,pattern=1)
eval_jk(results=sim_3_enri4,imputation_method=3,pattern=1)

eval_jk(results=sim_3_enri5,imputation_method=1,pattern=1)
eval_jk(results=sim_3_enri5,imputation_method=2,pattern=1)
eval_jk(results=sim_3_enri5,imputation_method=3,pattern=1)

eval_jk(results=sim_3_enri6,imputation_method=1,pattern=1)
eval_jk(results=sim_3_enri6,imputation_method=2,pattern=1)
eval_jk(results=sim_3_enri6,imputation_method=3,pattern=1)

```

The content of the file *functions.r* is as follows:

```

#####
# Authors #
#####

# Steven Nijman
# Jeroen Hoogland
# Thomas Debray

#####
# Package Requirements #
#####

library(foreign)
library(mice)      # version 3.6.0
library(condMVNorm) # version 2015.2-1
library(survival)

#####

#' Single patient joint imputation
#'
#' @author Steven W J Nijman \email{S.W.J.Nijman@umcutrecht.nl}
#' @author Jeroen Hoogland \email{J.Hoogland-2@umcutrecht.nl}
#' @author Thomas P A Debray \email{T.Debray@umcutrecht.nl}
#'
#' @param data single patient data
#' @param imp_means prior estimated column means of data
#' @param imp_cov prior estimated covariance matrix of data
#' @param n.imp number of imputations to make; default==1, which means it
uses expected values

```

```

#'
#' @return Returns single patient data with imputed values
impJoint <-
function(data=data,imp_means=imp_means,imp_cov=imp_cov,n.imp=1,...) {
  if (class(data) != "data.frame") {
    stop ("Data object should be a data frame")
  }
  if (nrow(data) > 1) {
    stop ("Data should contain a single patient")
  }
  if ("time" %in% colnames(data)) {
    stop ("No time info should be used for imputation")
  }
  if ("status" %in% colnames(data)) {
    stop ("No event info should be used for imputation")
  }

  dep <- which(is.na(data))
  given <- which(!is.na(data))
  depnames <- colnames(data[dep])
  givenames <- colnames(data[given])
  missing.col <- which(is.na(data))
  data <- as.matrix(data)

  if(length(given)==0) {
    data_imp <- t(as.data.frame(imp_means))
  } else if(length(given)>0) {
    # Extract conditional Mean and conditional var
    cond <-
condMVN(mean=imp_means,sigma=imp_cov,dep=dep,given=given,X=data[given])

    if (n.imp == 1) {
      # Just impute the expected value if we only need 1 imputation
      x.imp <- matrix(cond$condMean, nrow = 1)
    } else if (n.imp < 1000) {
      # We should not use multiple imputation of the number of imputed
values is very low.
      # The empirical covariance of imputed values is very unreliable in
such circumstances
      stop ("A minimum of 1000 imputations should be generated when drawing
random samples, instead of using the conditional mean.")
    } else {
      # Draw from a multivariate normal if multiple imputations required
      x.imp <- mvrnorm(n = n.imp, mu = cond$condMean, Sigma = cond$condVar,
tol = 1e-6, empirical = FALSE, EISPACK = FALSE)
    }

    x.obs <- matrix(data[given], nrow=n.imp, ncol=length(given), byrow =
TRUE)
    data_imp <- as.data.frame(cbind(x.obs, x.imp))
    colnames(data_imp) <- c(givenames, depnames)
  }
  data.frame(data_imp)
}

# calculate mse of imputation methods
testMSE <-
function(data=data,missing_var=missing_var,n.imp=n.imp,method="jackknife"
,seed=12345,...) {
  jmimpdat <- meanimpdat <- data

```

```

jmimpdat[,] <- meanimpdat[,] <- NA

if (!is.na(seed)) {
  set.seed(seed)
}

pb <- txtProgressBar(min = 0, max = nrow(data), style = 3)
for (i in 1:nrow(data)) {
  setTxtProgressBar(pb, i)

  if (method == "jackknife") {
    training_data <- data[-i,]
    test_case <- data[i,]
  } else if (method == "internal") {
    training_data <- data
    test_case <- data[i,]
  } else if (method == "external") {
    training_data <- model_data
    test_case <- data[i,]
  } else {
    stop ("Validation method not supported")
  }

  mu <- colMeans(training_data)
  sigma <- cov(training_data)

  test_case[,missing_var] <- NA

  meanimpdat[i,] <- jmimpdat[i,] <- test_case
  meanimpdat[i,missing_var] <- mu[missing_var]
  jmimpdat[i,missing_var] <-
impJoint(data=test_case,imp_means=mu,imp_cov=sigma)[missing_var]
}
close(pb)
if(length(missing_var)==1) {
  result <- data.frame(mse_meanimp = mean((meanimpdat[,missing_var] -
data[,missing_var])**2),
mse_jmimp = mean((jmimpdat[,missing_var] -
data[,missing_var])**2))
} else if(length(missing_var)>=2) {
  result <- data.frame(mse_meanimp = colMeans((meanimpdat[,missing_var] -
data[,missing_var])**2),
mse_jmimp = colMeans((jmimpdat[,missing_var] -
data[,missing_var])**2))
}

return(result)
}

# calibration intercept
cal_intercept <- function(model, data) {
  p <- log(predict(model, newdata = data, type="expected")) # Expected
number of events
  fit1 <- glm(status ~ offset(p), family="poisson", data = data)
  coef(fit1) # Should be 0
}

# calibration slope
cal_slope <- function(model, data) {
  p <- log(predict(model, newdata = data, type="expected"))

```

```

# Calculate the linear predictor
# lp <- model.matrix(model$formula,data)[,-1] %*% model$coefficients
lp <- matrix(data$lp) %*% model$coefficients
lpc <- predict(model, newdata = data, type="lp") #Centered linear
predictor
logbase <- p - lp
fit2 <- glm(status ~ lpc + offset(logbase), family = poisson, data =
data)
coef(fit2)["lpc"] # Should be 1
}

# ten year risk
ten_risk <- function(model=model,lp=lp) {
  base <- basehaz(fit,centered=F)
  timediff <- (abs(base$time-365*10)) # Identify patient with 10y follow-
up
  base10 <- base$hazard[which(timediff == min(timediff))] # Extract
cumulative baseline hazard for a patient with 10y follow-up
  predsurv <- exp(-base10)**(exp(lp))
  predrisk <- 1-predsurv

  # risk <- rep(NA,nrow(ds))
  # bh <- summary(survfit(Surv(time,status)~1,data=ds),time=3650)$surv #
10yr cumulative survival
  # for(i in 1:nrow(ds)) risk[i] <- 1-bh^exp(lp[i])

  return(predrisk)
}

# apparent performance of prediction model
apparent_performance <- function(data=data,...) {
  # fit <-
coxph(Surv(time,status)~leeftijd+geslacht+labchol+labhdl+bdsys+mht_all+ro
ken+vz_DM, data=data)
  fit <- coxph(Surv(time,status)~leeftijd+geslacht, data=data)

  # Calculate the linear predictor
  lp <- model.matrix(fit$formula,data)[,-1] %*% fit$coefficients

  # c-index
  cindex <-
as.numeric(survConcordance(Surv(time,status)~lp,data=data)$concordance)

  # calibration intercept
  intercept <- cal_intercept(fit,data)

  # calibration slope
  slope <- cal_slope(fit,data)

  # EO
  eo <- sum(predict(fit,newdata=data,type="expected"))/sum(data$status)

  return(c(cindex=cindex,
          cal_inter=intercept,
          cal_slope=slope,
          eo=eo))
}

# optimism corrected performance of prediction model

```

```

oc_performance <- function(data=data,...) {
  result <- array(NA,dim=c(nrow(data),3))
  colnames(result) <- c("lp","time","status")
  result[,c("time","status")] <- c(data[, "time"],data[, "status"])

  pb <- txtProgressBar(min = 0, max = nrow(data), style = 3)
  for(i in 1:nrow(data)) {
    setTxtProgressBar(pb, i)
    training_data <- data[-i,]
    test_case <- data[i,]

    # fit <-
    coxph(Surv(time,status)~leeftijd+geslacht+labchol+labhdl+bdsys+mht_all+ro
ken+vz_DM,data=training_data)
    fit <- coxph(Surv(time,status)~leeftijd+geslacht,data=training_data)

    # Calculate the linear predictor
    result[i,"lp"] <- model.matrix(fit$formula,test_case)[,-1] %*%
fit$coefficients
  }
  result <- as.data.frame(result)

  # refit cox
  fit2 <- coxph(Surv(time,status)~lp,data=result)

  # c-index
  cindex <-
as.numeric(survConcordance(Surv(time,status)~lp,data=result)$concordance)

  # calibration intercept
  intercept <- cal_intercept(fit2,result)

  # calibration slope
  slope <- cal_slope(fit2,result)

  # EO
  eo <-
sum(predict(fit2,newdata=result,type="expected"))/sum(result$status)

  return(c(cindex=cindex,
          cal_inter=intercept,
          cal_slope=slope,
          eo=eo))
}

#' Simulate missing data and impute using joint modelling imputation
#'
#' @author Steven W J Nijman \email{S.W.J.Nijman@@umcutrecht.nl}
#' @author Thomas P A Debray \email{T.Debray@@umcutrecht.nl}
#'
#' @param ref_data reference data, used to estimate prediction model in
#' @param ext_data used when validation==external, to specify data on
which imputation model should be estimated.
#' @param model_data used when validation==enrich, to specify prediction
model in jackknife sample of reference data, of which part is used to
enrich external data.
#' @param scenarios list of missing value scenarios using matching
colnames.

```





```

if(validation=="external") {
  aux_vars <- names(ref_data[which(names(ref_data) %in%
names(ext_data))])
} else {
  aux_vars <- names(ref_data[-which(names(ref_data) %in%
c("time","status"))])
}

if (!is.na(seed)) {
  set.seed(seed)
}

pb <- txtProgressBar(min = 0, max = nrow(sim_frame), style = 3)

# run simulation
for (i in 1:nrow(sim_frame)) {
  setTxtProgressBar(pb, i)
  j <- sim_frame[i,"rowref"]
  if("modelref" %in% colnames(sim_frame)) k <- sim_frame[i,"modelref"]

  # validation selection
  if (validation == "jackknife") {
    training_data <- imp_data <- ref_data[-j,]
    test_case <- ref_data[j,]
  } else if (validation == "internal") {
    training_data <- imp_data <- ref_data
    test_case <- ref_data[j,]
  } else if (validation == "external") {
    training_data <- ref_data[-j,]
    imp_data <- ext_data
    test_case <- ref_data[j,]
  } else if (validation == "enrich") {
    training_data <- model_data[-k,]
    imp_data <- ext_data
    test_case <- ref_data[j,]
  } else {
    stop ("Validation method not supported")
  }

  # estimate cox
  fit <-
coxph(Surv(time,status)~leeftijd+geslacht+labchol+labhdl+bdsys+mht_all+ro
ken+vz_DM, data=training_data)

  # calculate lp given complete data
  sim_frame[i,"lp_ref"] <- model.matrix(fit$formula,test_case)[,-1] %*%
fit$coefficients

  # given scenario make specified predictors missing
  missing_var <- scenarios[sim_frame[i,"scenario"]][[1]]
  test_case[,missing_var] <- NA

  # estimate means and covariance based on pre-specified training data
  mu <- colMeans(imp_data[,aux_vars])
  sigma <- cov(imp_data[,aux_vars])

  # given method specify imputation (mean, joint or joint with auxiliary)
  method_num <- as.numeric(sim_frame[i,"method"])
  if(method_num==1) {
    test_case[,missing_var] <- mu[missing_var]
  }
}

```

```

} else if(method_num==2) {
  test_case[,missing_var] <- impJoint(data=test_case[,frh_vars],
                                     imp_means=mu[frh_vars],
                                     imp_cov=sigma[frh_vars,frh_vars])[missing_var]
} else if(method_num==3) {
  test_case[,missing_var] <- impJoint(data=test_case[,aux_vars],
                                     imp_means=mu,
                                     imp_cov=sigma)[missing_var]
}

# extract expected number of events
sim_frame[i,"Expected"] <- predict(fit, newdata = test_case,
type="expected")

# calculate estimated lp given imputed data
sim_frame[i,"lp_est"] <- model.matrix(fit$formula,test_case)[,-1] %*%
fit$coefficients
}
return(as.data.frame(sim_frame))
}

eval_jk <- function(results = results,
                    imputation_method = 1,
                    pattern = 1,...) {
  data <- subset(results, method==imputation_method & scenario==pattern)
  mse <- (sum((data$lp_ref-data$lp_est)**2))/nrow(data)
  cindex <- as.numeric(survConcordance(Surv(time, status)~lp_est,
data=data)$concordance)

# calculate required estimates (Crowson 2016)
p <- log(data$Expected)
data$lp_c <- data$lp_est - mean(data$lp_est)
logbase <- p - data$lp_est

# extract quantities of interest
slope <- as.numeric(glm(status ~ lp_c + offset(logbase), family =
poisson, data = data)$coefficients["lp_c"])
inter <- as.numeric(glm(status ~ offset(p), family="poisson", data =
data)$coefficients["(Intercept)"])

# calculate base OE
OE1 <- sum(data$Expected) / sum(data$status)
data$group <- cut(data$lp_c,quantile(data$lp_c,probs=seq(0,1,0.33)))
OE <- rep(NA,length(unique(data$group)))
for(i in 1:length(unique(data$group))) {
  OE[i] <- sum(data$Expected[which(data$group==levels(data$group)[i])]) /
sum(data$status[which(data$group==levels(data$group)[i])])
}

return(list(MSE = mse,
           Cindex = cindex,
           Cal_intercept = inter,
           Cal_slope = slope,
           baseOE = OE1,
           seqOE = OE))
}

get_groupkm <- function(sim=sim,m=3,scen=scen) {
  km <- list()
  for(i in 1:m) {

```

```

data      <- subset(sim, method==i & scenario==scen)
timediff  <- abs(data$time-365*10)
tenyrpatient <- data[which(timediff == min(timediff)),]
base.risk.10y <- tenyrpatient$Expected/exp(tenyrpatient$lp_ref)
surv.10y    <- exp(-base.risk.10y)
predrisk    <- 1 - (surv.10y^exp(data$lp_est))
km[[i]]     <-
groupkm(predrisk, Surv(data$time, data$status), g=5, u=(10*365), pl=F)
}
km1 <- data.frame(km[[1]])
km2 <- data.frame(km[[2]])
km3 <- data.frame(km[[3]])
data <- rbind(km1, km2, km3)
data$method <- as.factor(c(rep("MI", 5), rep("JMI", 5), rep("JMI.adj", 5)))
return(data)
}

```
